# Supplementary material
Source: PubMed Central journal article supplement (PMC5890472)
Supplement: NIHMS953044-supplement-Supplemental_file.pdf [file NIHMS953044-supplement-Supplemental_file.pdf]

## Supplementary material for Partition-based ultrahigh-dimensional variable screening

BY JIAN KANG

*Department of Biostatistics, University of Michigan, Ann Arbor, Michigan 48109, U.S.A*  
 jiankang@umich.edu

5

HYOKYOUNG G. HONG

*Department of Statistics and Probability, Michigan State University, East Lansing, Michigan 48823, U.S.A*  
 hhong@msu.edu

AND YI LI

*Department of Biostatistics, University of Michigan, Ann Arbor, Michigan 48109, U.S.A*  
 yili@umich.edu

10

### 1. REGULARITY CONDITIONS FOR SURE SCREENING PROPERTIES

We discuss the conditions for the uniform convergence results at the sample level.

*Condition A.* Suppose the covariates can be partitioned into  $G$  disjoint groups with group index  $g \in \{1, \dots, G\}$ . Denote by  $g_j$  the group membership for variable  $X_j$ .

A.1. Suppose that  $\{\bar{\beta}_{g,0}^*, \bar{\beta}_g^*\}$  is an interior point of a sufficiently large, compact and convex set  $\mathcal{D}_g = \{(\beta_{g,0}^*, \beta_g^*) : |\beta_{g,0}^* - \bar{\beta}_{g,0}^*| + \|\beta_g^* - \bar{\beta}_g^*\|_1 < D_g\}$ , where  $D_g > 0$ .

A.2. The Fisher information is

$$I_g(\beta_{g,0}^*, \beta_g^*) = E\{b''(\beta_{g,0}^* + X_g^{*\text{T}}\beta_g^*)(1, X_g^{*\text{T}})^\text{T}(1, X_g^{*\text{T}})\},$$

and

$$\sup_{(\beta_{g,0}^*, \beta_g^*) \in \mathcal{D}_g, \|X_g^*\| = 1} \|I_g(\beta_{g,0}^*, \beta_g^*)^{1/2}(1, X_g^{*\text{T}})^\text{T}\| < \infty.$$

A.3. There exist positive constants  $r_0, r_1, s_0, s_1$  and  $\alpha$  such that

$$\text{pr}(|X_j| > t) \leq r_1 \exp(-r_0 t^\alpha)$$

for a sufficiently large  $t$  and that

$$E[\exp\{b(\beta_0 + X^\text{T}\beta + s_0) - b(\beta_0 + X^\text{T}\beta)\}] + E[\exp\{b(\beta_0 + X^\text{T}\beta - s_0) - b(\beta_0 + X^\text{T}\beta)\}] \leq s_1.$$

A.4. Suppose that  $b''(\theta)$  is continuous and positive, as a function of  $\theta$ .

A.5. For  $g = 1, \dots, G$ , there exists a sequence  $R_n > 0$  and we assume that

20

(a) there exists an  $\epsilon_1 > 0$  such that

$$\sup_{\{\beta_{g,0}^*, \beta_g^*\} \in \mathcal{D}_g, \|(\beta_{g,0}^*, \beta_g^*) - (\bar{\beta}_{g,0}^*, \bar{\beta}_g^*)\| \leq \epsilon_1} |E\{b(\beta_{g,0}^* + X_g^{*\text{T}}\beta_g^*)I[|X_j| > R_n]\}| \leq o(S_g n^{-1}),$$

for all  $j$  such that  $g_j = g$ ;

(b) for a given  $\{\beta_{g,0}^*, \beta_g^*\} \in \mathcal{D}_g$ , the function  $l(\beta_{g,0}^* + \xi_g^T \beta_g^*, \eta)$  is Lipschitz with a positive constant  $r_{g,n}$ . That is, for all  $(\xi_g^T, \eta)^T$  in  $\Psi_{n,g} = \{(\xi_g, \eta) \mid \|\xi_g\|_\infty \leq R_n, |\eta| \leq r_0 R_n^\alpha / s_0\}$ , we have that

$$|l(\beta_{g,0}^* + \xi_g^T \beta_g^*, \eta) - l(\beta_{g,0}^{*'} + \xi_g^T \beta_g^{*'}, \eta)| \leq r_{g,n} |\beta_{g,0}^* + \xi_g^T \beta_g^* - (\beta_{g,0}^{*'} + \xi_g^T \beta_g^{*'})|,$$

for any  $\{\beta_{g,0}^*, \beta_g^*\}, \{\beta_{g,0}^{*'}, \beta_g^{*'}\} \in \mathcal{D}_g$ .

A.6. For  $g = 1, \dots, G$  and  $\{\beta_{g,0}^*, \beta_g^*\} \in \mathcal{D}_g$ ,

$$E\{l(\beta_{g,0}^* + X_g^{*T} \beta_g^*, Y) - l(\bar{\beta}_{g,0}^* + X_g^{*T} \bar{\beta}_g^*, Y)\} \geq K_0 \{\|\beta_g^* - \bar{\beta}_g^*\|^2 + (\beta_{g,0}^* - \bar{\beta}_{g,0}^*)^2\},$$

for a positive  $K_0$ .

Of note, many generalised linear models, such as linear regression, logistic regression and Poisson regression, satisfy Conditions A.1–A.5 for any group partition. In particular, by taking  $r_{g,n} = b'(R_n D_g S_g) + r_0 R_n^\alpha / s_0$ , Condition A.5 holds for all models in the exponential family for any group partition. For logistic regression,  $r_{g,n}$  is a finite constant. Additionally, Condition A.6 ensures model identifiability with group partitions. Similar conditions are also used for the theoretical development of sure and conditional sure independence screening (Fan & Song, 2010; Barut et al., 2016).

## 2. REGULARITY CONDITIONS FOR THE UPPER BOUND OF THE FALSE POSITIVE RATE

*Condition B.* Suppose the covariates can be partitioned into  $G$  disjoint groups with a group index  $g \in \{1, \dots, G\}$ :

- B.1. define  $e_g = Y - b'(X_g^{*T} \beta_g^*)$ , for  $g = 1, \dots, G$ . Assume that  $\text{var}(e_g) > c_6$  for  $c_6 > 0$  and  $\sup_{1 \leq g \leq G} E(|e_g|^{2+l}) < \infty$  for some  $l > 0$ ;
- B.2. for  $j \in \mathcal{M}^c$ , we have that  $E_{b'}(Y \mid X_{-j}^*) = E_{b'}(Y \mid X_{-j}^*, X_j)$ ;
- B.3.  $n^{1/2} |\mathcal{M}| = o(p)$ .

Condition B.1 includes mild assumptions to ensure the asymptotic normality of the proposed screening statistics. Similar conditions have been used by others (Barut et al., 2016; Heyde, 2008). By Theorem 1, Condition B.2 is equivalent to  $\bar{\beta}_j = 0$  for all  $j \in \mathcal{M}^c$ . Condition B.3 does not allow the number of true signals to grow too fast as  $n \rightarrow \infty$ .

## 3. PROOF OF THEOREM 1

*Proof.* When  $X_j$  is eliminated in group  $g$ , (3) in § 3 becomes

$$(\tilde{\beta}_{g,0}^*, \tilde{\beta}_{-j}^*) = \operatorname{argmax}_{(\beta_{g,0}, \beta_{-j}^*)} E \{l(\beta_{g,0} + X_{-j}^{*T} \beta_{-j}^*, Y)\},$$

which satisfies

$$E\{b'(\tilde{\beta}_{g,0}^* + X_{-j}^{*T} \tilde{\beta}_{-j}^*)(1, X_{-j}^{*T})^T\} = E\{Y(1, X_{-j}^{*T})^T\}. \quad (\text{S1})$$

On the other hand, (4) in § 3 is equivalent to

$$\begin{aligned} E\{b'(\bar{\beta}_{g,0}^* + X_{-j}^{*T} \bar{\beta}_{-j}^* + X_j \bar{\beta}_j)(1, X_{-j}^{*T})^T\} &= E\{Y(1, X_{-j}^{*T})^T\}, \\ E\{b'(\bar{\beta}_{g,0}^* + X_{-j}^{*T} \bar{\beta}_{-j}^* + X_j \bar{\beta}_j) X_j\} &= E\{Y X_j\}. \end{aligned}$$

When  $\bar{\beta}_j = 0$ ,  $E\{b'(\bar{\beta}_{g,0}^* + X_{-j}^{*\text{T}}\bar{\beta}_{-j}^* + X_j\bar{\beta}_j)\} = E\{b'(\bar{\beta}_{g,0}^* + X_{-j}^{*\text{T}}\bar{\beta}_{-j}^*)(1, X_{-j}^{*\text{T}})^\text{T}\} = E\{Y(1, X_{-j}^{*\text{T}})^\text{T}\}$ , implying that  $(\bar{\beta}_{g,0}^*, \bar{\beta}_{-j}^*)$  is a solution to (S1).

Under the assumption that the solution to (S1) is unique, we have

$$\bar{\beta}_{g,0}^* = \tilde{\beta}_{g,0}^*, \quad \bar{\beta}_g^* = \tilde{\beta}_g^*.$$

Using Definition 1 of  $E_{b'}(\cdot | \cdot)$  completes the proof for the necessary part.

Now, we prove the sufficient condition. First,

$$E_{b'}(Y | X_{-j}^*) = E_{b'}(Y | X_{-j}^*, X_j)$$

implies that

$$b'(\tilde{\beta}_{g,0}^* + X_{-j}^{*\text{T}}\tilde{\beta}_{-j}^* + X_j \times 0) = b'(\tilde{\beta}_{g,0}^* + X_{-j}^{*\text{T}}\tilde{\beta}_{-j}^* + X_j\tilde{\beta}_j).$$

By Definition 1, this further implies that  $(\tilde{\beta}_{g,0}^*, \tilde{\beta}_{-j}^*, 0)^\text{T}$  is a solution of (4). By the uniqueness of solutions to (4), and given that  $(\bar{\beta}_{g,0}^*, \bar{\beta}_{-j}^*, \bar{\beta}_j)^\text{T}$  is also a solution to (4), we have  $\bar{\beta}_j = 0$ . 50

#### 4. PROOF OF THEOREM 2

*Proof.* For each  $j$ , let  $g = g_j$  and  $\Omega_j = E\{\delta_j(1, X_{-j}^{*\text{T}}, X_j)^\text{T}(1, X_{-j}^{*\text{T}}, X_j)\}$ , where

$$\delta_j = \frac{b'(\bar{\beta}_{g,0}^* + X_{-j}^{*\text{T}}\bar{\beta}_{-j}^* + X_j\bar{\beta}_j) - b'(\tilde{\beta}_{g,0}^* + X_{-j}^{*\text{T}}\tilde{\beta}_{-j}^*)}{(\bar{\beta}_{g,0}^* + X_{-j}^{*\text{T}}\bar{\beta}_{-j}^* + X_j\bar{\beta}_j) - (\tilde{\beta}_{g,0}^* + X_{-j}^{*\text{T}}\tilde{\beta}_{-j}^*)}.$$

Because  $b''(\cdot)$  is positive,  $\delta_j > 0$ .

From (4) in § 3 and (S1),

$$E\{b'(\bar{\beta}_{g,0}^* + X_{-j}^{*\text{T}}\bar{\beta}_{-j}^* + X_j\bar{\beta}_j)(1, X_{-j}^{*\text{T}})^\text{T}\} = E\{b'(\tilde{\beta}_{g,0}^* + X_{-j}^{*\text{T}}\tilde{\beta}_{-j}^*)(1, X_{-j}^{*\text{T}})^\text{T}\} = E\{Y(1, X_{-j}^{*\text{T}})^\text{T}\}.$$

Let  $\check{\beta}_{-j}^* = \bar{\beta}_{-j}^* - \tilde{\beta}_{-j}^*$  and  $\check{\beta}_{g,0}^* = \bar{\beta}_{g,0}^* - \tilde{\beta}_{g,0}^*$ . Recall the definition of  $\delta_j$ . We have 55

$$E\{\delta_j(\check{\beta}_{g,0}^* + X_{-j}^{*\text{T}}\check{\beta}_{-j}^* + X_j\bar{\beta}_j)(1, X_{-j}^{*\text{T}})^\text{T}\} = 0. \quad (\text{S2})$$

We can partition  $\Omega_j$  as

$$\Omega_j = \begin{bmatrix} E\{\delta_j(1, X_{-j}^{*\text{T}})^\text{T}(1, X_{-j}^{*\text{T}})\} & E\{\delta_j(1, X_{-j}^{*\text{T}})^\text{T}X_j\} \\ E\{\delta_jX_j(1, X_{-j}^{*\text{T}})\} & E(\delta_jX_j^2) \end{bmatrix} = \begin{pmatrix} \Omega_j^{**} & \Omega_j^* \\ \Omega_j^{*\text{T}} & \Omega_{j,j} \end{pmatrix}.$$

Solving (S2),

$$(\check{\beta}_{g,0}^*, \check{\beta}_{-j}^*)^\text{T} = -(\Omega_j^{**})^{-1}\Omega_j^*\bar{\beta}_j.$$

By Definition 1 and the definition of  $\delta_j$ , we have

$$\begin{aligned} E[X_j\{E_{b'}(Y | X_{-j}^*, X_j) - E_{b'}(Y | X_{-j}^*)\}] &= E[X_j\{\delta_j(\check{\beta}_{g,0}^* + X_{-j}^{*\text{T}}\check{\beta}_{-j}^* + X_j\bar{\beta}_j)\}] \\ &= \{\Omega_{j,j} - \Omega_j^{*\text{T}}(\Omega_j^{**})^{-1}\Omega_j^*\}\bar{\beta}_j. \end{aligned}$$

To bound  $\Omega_{j,j} - \Omega_j^{*\text{T}}(\Omega_j^{**})^{-1}\Omega_j^*$ , we first apply a blockwise Cholesky decomposition and obtain

$$\left\{ \begin{array}{cc} I_{S_g} & 0 \\ -\Omega_j^{*\text{T}}(\Omega_j^{**})^{-1} & 1 \end{array} \right\} \Omega_j \left\{ \begin{array}{cc} I_{S_g} & -(\Omega_j^{**})^{-1}\Omega_j^* \\ 0 & 1 \end{array} \right\} = \left\{ \begin{array}{cc} \Omega_j^{**} & 0 \\ 0 & \Omega_{j,j} - \Omega_j^{*\text{T}}(\Omega_j^{**})^{-1}\Omega_j^* \end{array} \right\}, \quad (\text{S3})$$

where  $I_{S_g}$  is an identity matrix with dimension  $S_g$ . Since  $\Omega_j$  is positive definite by assumption, we have  $\Omega_{j,j} - \Omega_j^{*\top}(\Omega_j^{**})^{-1}\Omega_j^* > 0$ .

Furthermore, by Condition 2 and the monotonicity of function  $b'(\cdot)$ , it follows that  $0 < \delta_j \leq L$ , where  $L$  is the Lipschitz constant. Hence,  $0 < \Omega_{j,j} \leq LE(X_j^2) \leq c_1$  for a positive constant  $c_1$ . Furthermore, because  $\Omega_j^{**}$  is semi-positive definite, we have that  $\Omega_j^{*\top}(\Omega_j^{**})^{-1}\Omega_j^* \geq 0$ . Therefore,  $0 < \Omega_{j,j} - \Omega_j^{*\top}(\Omega_j^{**})^{-1}\Omega_j^* \leq \Omega_{j,j} \leq c_1$ .

By Condition 1, we have

$$|\bar{\beta}_j| \geq c_1^{-1} |E[X_j \{E_{b'}(Y | X_{-j}^*, X_j) - E_{b'}(Y | X_{-j}^*)\}]| \geq c_2 n^{-\kappa},$$

where  $c_2 = c_0/c_1$  for all  $j \in \mathcal{M}$ , which completes the proof.

### 5. PROOF OF THEOREM 3

*Proof.* By Lemma 1 of Fan & Song (2010) and Condition A-3, for any  $t > 0$ ,

$$\text{pr}(|Y| > t) \leq s_1 \exp(-s_0 t).$$

Furthermore, for each  $g = 1, \dots, G$ , we have

$$\begin{aligned} \text{pr}(\Psi_{g,n}^c) &\leq \text{pr}(\|X_g^*\|_\infty > R_n) + \text{pr}(|Y| > r_0 R_n^\alpha / s_0) \\ &\leq \sum_{j:g_j=g} \text{pr}(|X_j| > R_n) + s_1 \exp(-r_0 R_n^\alpha) \\ &\leq (S_g r_1 + s_1) \exp(-r_0 R_n^\alpha), \end{aligned}$$

where  $R_n \rightarrow \infty$  as  $n \rightarrow \infty$ .

By taking  $V_n = K_0$ ,  $k_n = r_{g,n} = b'(R_n D_g S_g) + r_0 R_n^\alpha / s_0$  and  $t = c_2 V_n n^{1/2-\kappa} / (8k_n) - 1$  in Theorem 1 of Fan & Song (2010), for each  $j$ , we have that

$$\begin{aligned} \text{pr}\left(|\hat{\beta}_j - \bar{\beta}_j| \geq c_2 n^{-\kappa} / 2\right) &\leq \text{pr}\left(\|\hat{\beta}_{g_j}^* - \bar{\beta}_{g_j}^*\| \geq c_2 n^{-\kappa} / 2\right) \\ &\leq \exp(-c_3 Q_{g_j,n}) + n \text{pr}(\Psi_{g_j,n}^c), \end{aligned} \tag{S4}$$

for a positive constant  $c_3$  and  $Q_{g,n} = n^{1-2\kappa} (r_{g,n} R_n)^{-2}$ . Then we have that

$$\begin{aligned} \text{pr}\left(\max_{1 \leq j \leq p} |\hat{\beta}_j - \bar{\beta}_j| \geq c_2 n^{-\kappa} / 2\right) &\leq \sum_{j=1}^p \exp(-c_3 Q_{g_j,n}) + \sum_{j=1}^p n \text{pr}(\Psi_{g_j,n}^c) \\ &= \sum_{g=1}^G S_g \exp(-c_3 Q_{g,n}) + \sum_{g=1}^G S_g (S_g r_1 + s_1) n \exp(-r_0 R_n^\alpha). \end{aligned}$$

This completes the proof for part (a). For part (b), we consider the event

$$\mathcal{E}_n = \left\{ \max_{j \in \mathcal{M}} |\hat{\beta}_j - \bar{\beta}_j| \leq c_2 n^{-\kappa} / 2 \right\}.$$

By Theorem 2,

$$\min_{j \in \mathcal{M}} |\bar{\beta}_j| \geq c_2 n^{-\kappa}.$$

Thus, if event  $\mathcal{E}_n$  happens, it holds that for all  $j \in \mathcal{M}$ ,  $|\hat{\beta}_j| \geq c_2 n^{-\kappa} / 2$ .

By taking  $c_4 = c_2/2$  and  $\gamma = c_4 n^{-\kappa}$ , it follows immediately that  $\mathcal{E}_n \subset \{\mathcal{M} \subset \hat{\mathcal{M}}_\gamma\}$ . This implies that

$$\text{pr}(\mathcal{M} \subset \hat{\mathcal{M}}_\gamma) \geq \text{pr}(\mathcal{E}_n) = 1 - \text{pr}\left(\max_{j \in \mathcal{M}} |\hat{\beta}_j - \bar{\beta}_j| > c_2 n^{-\kappa}/2\right).$$

Applying (S4) and Bonferroni's inequality over all  $j \in \mathcal{M}$  completes the proof.

## 6. PROOF OF THEOREM 4

*Proof.* By Condition 5, we can bound the determinant of the Schur complement (von Neumann & Goldstine, 1947) of block  $\Omega_j^*$  in  $\Omega_j$  as follows:

$$|\Omega_{j,j} - \Omega_j^{*\text{T}}(\Omega_j^{**})^{-1}\Omega_j^*| \geq \lambda_{\min}(\Omega_j) > K_1,$$

for  $j = 1, \dots, p$ .

By (2) and the Lipschitz continuity of  $b'(\theta)$ ,

$$\begin{aligned} |\bar{\beta}_j| &< M_0 |E[X_j \{E_{b'}(Y | X^\text{T}) - E_{b'}(Y | X_{-j}^{*\text{T}})\}]| \\ &\leq M_0 E|X_j \{b'(\beta_0 + X^\text{T}\beta) - b'(\tilde{\beta}_{g_j,0} + X_{-j}^{*\text{T}}\tilde{\beta}_{-j}^*)\}| \\ &\leq M_1 E|X_j \{\beta_0 + X^\text{T}\beta - \tilde{\beta}_{g_j,0} - X_{-j}^{*\text{T}}\tilde{\beta}_{-j}^*\}| \\ &= M_1 E \left| X_j \left\{ \beta_0 - \tilde{\beta}_{g_j,0} + X_{-j}^{*\text{T}}(\beta_{-j}^* - \tilde{\beta}_{-j}^*) + \sum_{g' \neq g_j} X_{g'}^{*\text{T}}\beta_{g'}^* + X_j\beta_j \right\} \right|, \end{aligned}$$

where  $M_0 = K_1^{-1}$ ,  $M_1 = M_0 L$  and  $(\beta_0, \beta^\text{T})^\text{T}$  are the true parameters in model (1) in § 2. Simplifying the above inequality, we have

$$|\bar{\beta}_j| < M_1 E \left| X_j (X_j\beta_j + \check{X}_{-j}^\text{T}\check{\beta}_{-j}^\delta + \check{X}_{-g_j}^{*\text{T}}\check{\beta}_{-g_j}) \right|, \quad (\text{S5})$$

where

$$\check{X}_{-j} = (1, X_{-j}^{*\text{T}})^\text{T}, \quad \check{\beta}_{-j}^\delta = (\beta_0 - \beta_{g_j,0}, \beta_{-j}^{*\text{T}} - \tilde{\beta}_{-j}^{*\text{T}})^\text{T},$$

$$\check{X}_{-g}^* = (X_1^{*\text{T}}, \dots, X_{g-1}^{*\text{T}}, X_{g+1}^{*\text{T}}, \dots, X_G^{*\text{T}})^\text{T},$$

$$\check{\beta}_{-g}^* = (\beta_1^{*\text{T}}, \dots, \beta_{g-1}^{*\text{T}}, \beta_{g+1}^{*\text{T}}, \dots, \beta_G^{*\text{T}})^\text{T}.$$

By the properties of the generalised linear conditional expectation,

$$E\{E_1(X_j | X_{-j}^*, X_{g'}^*, g' \neq g_j) X_{-j}^{*\text{T}}\} = E(X_j X_{-j}^{*\text{T}}),$$

$$E\{E_1(X_j | X_{-j}^*, X_{g'}^*, g' \neq g_j) X_g^{*\text{T}}\} = E(X_j X_g^{*\text{T}}), \quad g \neq g_j.$$

Furthermore,

$$E\{E_1(X_j | X_{-j}^*, X_{g'}^*, g' \neq g_j) (\check{X}_{-j}^\text{T}\check{\beta}_{-j}^\delta + \check{X}_{-g_j}^{*\text{T}}\check{\beta}_{-g_j})\} = E\{X_j (\check{X}_{-j}^\text{T}\check{\beta}_{-j}^\delta + \check{X}_{-g_j}^{*\text{T}}\check{\beta}_{-g_j})\},$$

and

$$E\{E_1(X_j | X_{-j}^*, X_{g'}^*, g' \neq g_j) E_1(X_j | X_{-j}^*, X_{g'}^*, g' \neq g_j)\} = E\{X_j E_1(X_j | X_{-j}^*, X_{g'}^*, g' \neq g_j)\}.$$

Let  $V_j = E \left[ \{X_j - E_1(X_j | X_{-j}^*, X_{g'}^*, g' \neq g_j)\}^2 \right]$ . Then

$$\begin{aligned} V_j &= E \left[ \{X_j - E_1(X_j | X_{-j}^*, X_{g'}^*, g' \neq g_j)\} \{X_j - E_1(X_j | X_{-j}^*, X_{g'}^*, g' \neq g_j)\} \right] \\ &= E(X_j^2) - E\{E_1(X_j | X_{-j}^*, X_{g'}^*, g' \neq g_j)X_j\}. \end{aligned}$$

This further implies that

$$\begin{aligned} V_j \beta_j + U_j &= E(X_j^2 \beta_j) - E \left\{ E_1(X_j | X_{-j}^*, X_{g'}^*, g' \neq g_j) X_j \right\} \beta_j \\ &\quad + E \left\{ E_1(X_j | X_{-j}^*, X_{g'}^*, g' \neq g_j) \left( \beta_0 - \tilde{\beta}_{g_j,0} + X^T \beta - X_{-j}^{*T} \tilde{\beta}_{-j}^* \right) \right\} \\ &= E(X_j^2 \beta_j) + E \left[ E_1(X_j | X_{-j}^*, X_{g'}^*, g' \neq g_j) \left\{ \beta_0 - \tilde{\beta}_{g_j,0} + X_{-j}^{*T} (\beta_{-j}^* - \tilde{\beta}_{-j}^*) + \sum_{g' \neq g_j} X_{g'}^{*T} \beta_{g'}^* \right\} \right] \\ &= E(X_j^2 \beta_j) + E \left\{ E_1(X_j | X_{-j}^*, X_{g'}^*, g' \neq g_j) \left( \check{X}_{-j}^T \check{\beta}_{-j}^\delta + \check{X}_{-g_j}^{*T} \check{\beta}_{-g_j} \right) \right\} \\ &= E \left\{ X_j \left( X_j \beta_j + \check{X}_{-j}^T \check{\beta}_{-j}^\delta + \check{X}_{-g_j}^{*T} \check{\beta}_{-g_j} \right) \right\}. \end{aligned}$$

80 Thus, we can write (S5) in a vector form:

$$\|\bar{\beta}\|^2 \leq M_1^2 \|\Sigma \beta + U\|^2, \quad (\text{S6})$$

where  $\bar{\beta} = (\bar{\beta}_1, \dots, \bar{\beta}_p)^T$  and  $\Sigma = \text{diag}(V_1, \dots, V_p)$ .

Furthermore,  $V_j = E(X_j^2) - \{E(X_j)\}^2 + \{E(X_j)\}^2 - E\{E_1(X_j | X_{-j}^*, X_{g'}^*, g' \neq g_j)\}^2 \leq \text{var}(X_j)$  and

$$\|\Sigma \beta\|_2^2 \leq V \beta^T \Sigma \beta \leq V \sum_{j=1}^p \text{var}(X_j \beta_j) = O(V).$$

The right-hand side of (S6) can be further bounded as follows:

$$\begin{aligned} \|\Sigma \beta + U\|_2^2 &= \beta^T \Sigma^2 \beta + 2U^T \Sigma \beta + U^T U \\ &\leq V \beta^T \Sigma \beta + 2U^T \Sigma \beta + U^T U \\ &\leq V \sum_{j=1}^p \text{var}(X_j \beta_j) + 2U^T \Sigma \beta + U^T U, \end{aligned}$$

where the last two terms are  $o(V)$  based on Condition 6. Hence,

$$\|\bar{\beta}\|^2 = O(V).$$

This further implies that the number of  $j$ 's such that  $|\bar{\beta}_j| > \gamma/2 = c_4 n^{-\kappa}/2$  cannot exceed  $O(n^{2\kappa} V)$ . That is, letting  $\bar{\mathcal{M}}_{\gamma/2} = \{j : |\bar{\beta}_j| > c_4 n^{-\kappa}/2\}$ , we have that  $|\bar{\mathcal{M}}_{\gamma/2}| = O(n^{2\kappa} V)$ . Consider

$$\mathcal{F}_n = \left\{ \max_{1 \leq j \leq p} |\hat{\beta}_j - \bar{\beta}_j| \leq c_4 n^{-\kappa}/2 \right\}.$$

Then on the event  $\mathcal{F}_n$ ,  $\hat{\mathcal{M}}_\gamma = \{j : |\hat{\beta}_j| > c_4 n^{-\kappa}\}$  is a subset of  $\bar{\mathcal{M}}_{\gamma/2}$ . More precisely, we have

$$\left\{ |\hat{\mathcal{M}}_\gamma| \leq |\bar{\mathcal{M}}_{\gamma/2}| \right\} \supseteq \left\{ \hat{\mathcal{M}}_\gamma \subset \bar{\mathcal{M}}_{\gamma/2} \right\} \supseteq \left\{ \mathcal{F}_n \cap \{ \hat{\mathcal{M}}_\gamma \subset \bar{\mathcal{M}}_{\gamma/2} \} \right\} = \mathcal{F}_n.$$

Thus

$$\text{pr} \left\{ |\hat{\mathcal{M}}_\gamma| \leq O(n^{2\kappa}V) \right\} \geq \text{pr}(\mathcal{F}_n).$$

Applying Theorem 3 part (a) and Bonferroni's inequality completes the proof.

### 7. PROOF OF THEOREM 6

*Proof.* For partition  $\mathcal{G}^{(k)}(k = 1, \dots, K)$ , let  $c_3^{(k)}, c_4^{(k)}, r_0^{(k)}, r_2^{(k)}, r_3^{(k)}, \gamma^{(k)}, Q_{g_j, n}^{(k)}, S_g^{(k)}, R_n^{(k)\alpha}$  and  $\hat{\mathcal{M}}_\gamma^{(k)}$  be the corresponding terms for  $c_3, c_4, r_0, r_2, r_3, \gamma, Q_{g_j, n}, S_g, R_n^\alpha$  and  $\hat{\mathcal{M}}_\gamma$  respectively in Theorems 3 and 4. Since  $\mathcal{G}^{(k)}$  satisfies Conditions 1–3, 85

$$\text{pr} \left( \mathcal{M} \subset \hat{\mathcal{M}}_\gamma^{(k)} \right) \geq 1 - \sum_{j \in \mathcal{M}} \exp \left( -c_3^{(k)} Q_{g_j, n}^{(k)} \right) - nr_3^{(k)} \exp \left( -r_0^{(k)} R_n^{(k)\alpha} \right).$$

Take  $c_3 = \min_{1 \leq l \leq K} c_4^{(l)} \leq c_4^{(k)}$ . Then  $\hat{\mathcal{M}}_\gamma^{(k)} \subset \tilde{\mathcal{M}}_\gamma$  and

$$\text{pr} \left( \mathcal{M} \subset \tilde{\mathcal{M}}_\gamma \right) \geq \text{pr} \left( \mathcal{M} \subset \hat{\mathcal{M}}_\gamma^{(k)} \right) \geq 1 - \sum_{j \in \mathcal{M}} \exp \left( -c_3^{(k)} Q_{g_j, n}^{(k)} \right) - nr_3^{(k)} \exp \left( -r_0^{(k)} R_n^{(k)\alpha} \right).$$

Taking  $n \rightarrow \infty$  on both sides completes the proof for part (a).

For part (b), since all  $\mathcal{G}^{(k)}$  satisfy Conditions A.1–A.5 and Conditions 4–6, by Theorem 4 we have that

$$\text{pr} \left\{ |\hat{\mathcal{M}}_\gamma^{(k)}| \leq O \left( n^{2\kappa} V^{(k)} \right) \right\} \geq 1 - \sum_{g=1}^{G^{(k)}} S_g^{(k)} \exp \left( -c_3^{(k)} Q_{g, n}^{(k)} \right) - nr_2^{(k)} \exp \left( -r_0^{(k)} R_n^{(k)\alpha} \right).$$

Since  $|\tilde{\mathcal{M}}_\gamma| \leq \sum_{k=1}^K |\hat{\mathcal{M}}_\gamma^{(k)}|$ ,

$$\begin{aligned} \left\{ |\tilde{\mathcal{M}}_\gamma| > O \left( n^{2\kappa} \sum_{k=1}^K V^{(k)} \right) \right\} &\subset \left\{ \sum_{k=1}^K |\hat{\mathcal{M}}_\gamma^{(k)}| > O \left( \sum_{k=1}^K n^{2\kappa} V^{(k)} \right) \right\} \\ &\subset \bigcup_{k=1}^K \left\{ |\hat{\mathcal{M}}_\gamma^{(k)}| > O \left( n^{2\kappa} V^{(k)} \right) \right\}. \end{aligned}$$

This further implies that

$$1 - \text{pr} \left\{ |\tilde{\mathcal{M}}_\gamma| > O \left( n^{2\kappa} \sum_{k=1}^K V^{(k)} \right) \right\} \geq 1 - \sum_{k=1}^K \text{pr} \left\{ |\hat{\mathcal{M}}_\gamma^{(k)}| > O \left( n^{2\kappa} V^{(k)} \right) \right\}.$$

Taking  $n \rightarrow \infty$  on both sides completes the proof for part (b).

### 8. PROOF OF THEOREM 7

*Proof.* First consider

$$E \left( \left| \hat{M}_\tau^\# \cap \mathcal{M}^c \right| \right) = \sum_{j \in \mathcal{M}^c} \text{pr} \left\{ I_j(\hat{\beta}_j)^{1/2} |\hat{\beta}_j| \geq \tau \right\}.$$

By Condition B.2 and Theorem 1, we have  $\bar{\beta}_j = 0$ . By Condition B.1 and the theory of quasi-likelihood (Heyde, 2008), we have

$$I_j(\hat{\beta}_j)^{1/2}|\hat{\beta}_j| \sim N(0, 1)$$

and according to the Berry–Esseen inequality (Korolev & Shevtsova, 2010), there exists a constant  $\tilde{c}_7 > 0$  such that

$$\sup_z \left| \Pr \left\{ I_j(\hat{\beta}_j)^{1/2}|\hat{\beta}_j| > z \right\} - \Phi(z) \right| \leq \tilde{c}_7 n^{-1/2}.$$

Let  $\tau = \Phi^{-1}\{1 - q/(2p)\}$ , then we have

$$E \left( \left| \hat{M}_\tau^\# \cap \mathcal{M}^c \right| \right) \leq \sum_{j \in \mathcal{M}^c} \left[ 2\{1 - \Phi(\tau)\} + \tilde{c}_7 n^{-1/2} \right] = (p - |\mathcal{M}|) \left( q/p + \tilde{c}_7 n^{-1/2} \right).$$

Because  $\left| \hat{M}_\gamma \cap \mathcal{M}^c \right| \leq \left| \hat{M}_\gamma \right| = \left| \hat{M}_\tau^\# \right| = \left| \hat{M}_\tau^\# \cap \mathcal{M}^c \right| + \left| \hat{M}_\tau^\# \cap \mathcal{M} \right| \leq \left| \hat{M}_\tau^\# \cap \mathcal{M}^c \right| + |\mathcal{M}|$ , we have

$$\text{EFPR}_\gamma = E \left( \frac{\left| \hat{M}_\gamma \cap \mathcal{M}^c \right|}{|\mathcal{M}^c|} \right) \leq q/p + \tilde{c}_7 n^{-1/2} + \frac{|\mathcal{M}|}{p - |\mathcal{M}|}.$$

By Condition B.3, there exist  $c_7 > 0$  and  $N_7 > 0$  such that for any  $n > N_7$ ,

$$\text{EFPR}_\gamma \leq q/p + c_7 n^{-1/2}.$$

## 9. COVARIATE PROJECTION VIA PRINCIPAL COMPONENT ANALYSIS

To make Condition 6 less restrictive, this section presents a method to generate surrogate covariates with a reduced-correlation structure for the screening procedures. Specifically, we decompose  $X$ , a vector of  $p$  continuous covariates, based on principal component analysis and project it to a set of variables with the largest loadings on the leading eigenvectors. We write

$$X = \Pi Z + \check{X},$$

where  $\Pi$ , a  $p \times Q$  matrix, is formed by selecting the first  $Q$  leading eigenvectors of the sample covariance matrix of  $X$ ,  $Z$  is a vector of  $Q$  projection loadings that can be obtained by ordinary least squares estimates given  $\Pi$  and  $X$ , and  $\check{X}$  is a vector of  $p$  residuals. The number of components  $Q$  can be chosen according to the proportion of variation explained by principal component analysis. When  $Q$  is large, the correlation among  $\check{X}$  can be much less than the correlation among  $X$ . However, we also need to keep  $Q$  small to ensure that the variation in  $\check{X}$  is relatively large and the variance of the screening statistics is small. In practice, we suggest choosing  $Q$  such that 50% of the variance of the covariate  $X$  is explained by  $\check{X}$ . Then with adjusting for  $Z$  we compute the partition-based screening statistics  $\check{\beta}_g^* = (\check{\beta}_j, g_j = g)$  based on  $\check{X}$  as follows:

$$(\check{\beta}_{g,0}^*, \check{\beta}_{g,Z}^*, \check{\beta}_g^*) = \underset{(\beta_{g,0}, \beta_{g,Z}, \beta_g^*)}{\operatorname{argmax}} E_n l \left( \beta_{g,0} + Z^T \beta_{g,Z} + \check{X}_g^{*T} \beta_g^*, Y \right),$$

where the definition of  $\check{X}_g^*$  is the same as  $X_g^*$  in § 2 except that we replace  $X$  with  $\check{X}$ . For a given threshold  $\gamma$ , the selected index set is  $\check{\mathcal{M}} = \{j : |\check{\beta}_j| > \gamma\}$ . We refer to this approach as partition-based screening with covariate projection.

We also perform simulation studies to compare this approach with the original partition-based screening approach. We generate data based on settings 1 and 4 in § 5 of the main text by slightly



Table S1. *Model selection accuracy of partition-based screening with and without covariate projections for both linear regression and logistic regression under Settings 1\* and 4\* with high correlation among covariates*

| Setting 1*                                                                                       | Linear Regression   |       |         |                      |       |         |
|--------------------------------------------------------------------------------------------------|---------------------|-------|---------|----------------------|-------|---------|
|                                                                                                  | Original covariates |       |         | Projected covariates |       |         |
|                                                                                                  | PIT (%)             | MMS   | TPR (%) | PIT (%)              | MMS   | TPR (%) |
| PartS ( $\mathcal{G}^{\text{red}}$ )                                                             | 70                  | 137   | 100     | 85                   | 72    | 100     |
| PartS ( $\mathcal{G}^{\text{mis}_1}$ )                                                           | 52                  | 192   | 100     | 48                   | 238   | 83      |
| PartS ( $\mathcal{G}^{\text{mis}_2}$ )                                                           | 47                  | 224   | 83      | 37                   | 263   | 83      |
| CombPartS (5 $\mathcal{G}^{\text{mis}_2}$ )                                                      | 63                  | 124   | 100     | 59                   | 146   | 100     |
| CombPartS (10 $\mathcal{G}^{\text{mis}_2}$ )                                                     | 61                  | 153   | 100     | 62                   | 1250  | 100     |
| CorrPartS ( $\mathcal{G}^{\text{cor}}$ )                                                         | 29                  | 362   | 83      | 34                   | 348   | 83      |
| Setting 1*                                                                                       | Logistic Regression |       |         |                      |       |         |
|                                                                                                  | Original covariates |       |         | Projected covariates |       |         |
|                                                                                                  | PIT (%)             | MMS   | TPR (%) | PIT (%)              | MMS   | TPR (%) |
| PartS ( $\mathcal{G}^{\text{red}}$ )                                                             | 100                 | 6     | 100     | 100                  | 6     | 100     |
| PartS ( $\mathcal{G}^{\text{mis}_1}$ )                                                           | 47                  | 219   | 83      | 29                   | 419   | 83      |
| PartS ( $\mathcal{G}^{\text{mis}_2}$ )                                                           | 34                  | 328   | 83      | 21                   | 621   | 83      |
| CombPartS (5 $\mathcal{G}^{\text{mis}_2}$ )                                                      | 55                  | 171   | 100     | 47                   | 234   | 83      |
| CombPartS (10 $\mathcal{G}^{\text{mis}_2}$ )                                                     | 55                  | 159   | 100     | 49                   | 214   | 83      |
| CorrPartS ( $\mathcal{G}^{\text{cor}}$ )                                                         | 28                  | 332   | 83      | 17                   | 576   | 83      |
| Setting 4*                                                                                       | Linear Regression   |       |         |                      |       |         |
|                                                                                                  | Original covariates |       |         | Projected covariates |       |         |
|                                                                                                  | PIT (%)             | MMS   | TPR (%) | PIT (%)              | MMS   | TPR (%) |
| SpatPartS ( $\mathcal{G}^{\text{opt}}$ )                                                         | 100                 | 100   | 100     | 100                  | 100   | 100     |
| SpatPartS ( $\mathcal{G}^{\text{red}}$ )                                                         | 100                 | 100   | 100     | 100                  | 100   | 100     |
| SpatPartS ( $\mathcal{G}^{\text{mis}_1}$ )                                                       | 0                   | 8762  | 59      | 0                    | 8797  | 57      |
| SpatPartS ( $\mathcal{G}^{\text{mis}_2}$ )                                                       | 0                   | 9385  | 52      | 0                    | 9460  | 49      |
| CombPartS ( $\mathcal{G}^{\text{red}}, \mathcal{G}^{\text{mis}_1}, \mathcal{G}^{\text{mis}_2}$ ) | 100                 | 100   | 100     | 100                  | 100   | 100     |
| Setting 4*                                                                                       | Logistic Regression |       |         |                      |       |         |
|                                                                                                  | Original covariates |       |         | Projected covariates |       |         |
|                                                                                                  | PIT (%)             | MMS   | TPR (%) | PIT (%)              | MMS   | TPR (%) |
| SpatPartS ( $\mathcal{G}^{\text{opt}}$ )                                                         | 0                   | 10000 | 0       | 0                    | 10000 | 0       |
| SpatPartS ( $\mathcal{G}^{\text{red}}$ )                                                         | 0                   | 9999  | 0       | 0                    | 9999  | 0       |
| SpatPartS ( $\mathcal{G}^{\text{mis}_1}$ )                                                       | 0                   | 9780  | 18      | 0                    | 9738  | 14      |
| SpatPartS ( $\mathcal{G}^{\text{mis}_2}$ )                                                       | 0                   | 9998  | 9       | 0                    | 9998  | 7       |
| CombPartS ( $\mathcal{G}^{\text{red}}, \mathcal{G}^{\text{mis}_1}, \mathcal{G}^{\text{mis}_2}$ ) | 0                   | 9780  | 18      | 0                    | 9738  | 14      |

CombPartS, combined partition-based screening; CorrPartS, correlation-guided partition screening; SpatPartS, spatial-oriented partition screening; MMS, the median minimum size of the selected models that are required to have a sure screening; TPR, the average true positive rate; PIT, the estimated probability of including all true predictors in the top  $n$  selected predictors.

modifying the correlation structure of covariates. In Setting 1, we change the exchangeable correlation to 0.9, and in Setting 4, we modify the exponential square correlation structure such that  $\text{cor}(X_j, X_{j'}) = 0.95$  when  $j$  and  $j'$  are neighbors. We refer to them as Settings 1\* and 4\*, respectively. Table S1 summarizes the comparisons of the model selection accuracy between the two methods. When the group partition is a size-reduced partition, the covariate projection can improve the model selection accuracy for linear regression in Setting 1\*. However, there are no clear improvements for linear regression in Setting 4\* and logistic regression in either setting.

## 10. SIMULATION STUDIES FOR GOODNESS-OF-FIT ADJUSTMENT

This section presents additional simulations to evaluate the adjusted partition-based screening in § 4.1. The data were generated using the same Settings 1–4 as in § 5. The group partitions were also kept the same as those for the partition-based screening method in each scenario in § 5. Table

S2 summarizes the results. For comparisons, Table S2 also includes the model selection accuracy of the partition-based screening listed in Table 1 in § 5. Based on a size-reduced partition,  $\mathcal{G}^{\text{red}}$ , the adjustment produces a clear improvement in the model selection accuracy for both linear regression and logistic regression in most cases except for Setting 4, where it has a comparable performance for linear regression but has a much worse accuracy for logistic regression. For the correlation-guided partitions,  $\mathcal{G}^{\text{cor}}$ , the adjustment improves the accuracy in Setting 2 for both linear regression and logistic regression, while it decreases the selection accuracy substantially in Setting 3, where the predictors are highly correlated with an exchangeable correlation of 0.9. For the misspecified partitions,  $\mathcal{G}^{\text{mis}_1}$  and  $\mathcal{G}^{\text{mis}_2}$ , the adjustment only improves the accuracy in Setting 1 with  $\mathcal{G}^{\text{mis}_1}$  for linear regression, while in all other cases it performs worse, especially in Setting 4, where the noise predictors are highly correlated with the true predictors. For combined partition-based screening, the adjustment is not helpful in all cases either. In summary, the adjusted partition-based screening may improve the model selection accuracy when the predictors are not highly correlated, but it may produce worse results in many other cases.

## 11. ADDITIONAL DATA ANALYSIS RESULTS

This section presents additional data analysis results. Figure S1 presents the boxplots of the mean prediction errors estimated through ten-fold cross-validation, indicating that combined partition-based screening has the best prediction accuracy. This conclusion is also confirmed by the prediction receiver operating characteristic curves in Fig. S2. Figure S3 shows seven axial slices that cut through eight important brain regions, which are selected based on the combined partition-based screening method.

## REFERENCES

- BARUT, E., FAN, J. & VERHASSELT, A. (2016). Conditional sure independence screening. *J. Am. Statist. Assoc.* **111**, 1266–77.
- FAN, J. & SONG, R. (2010). Sure independence screening in generalized linear models with NP-dimensionality. *Ann. Statist.* **38**, 3567–604.
- HEYDE, C. C. (2008). *Quasi-Likelihood and Its Application: a General Approach to Optimal Parameter Estimation*. New York: Springer.
- KOROLEV, V. Y. & SHEVTSOVA, I. G. (2010). On the upper bound for the absolute constant in the Berry–Esseen inequality. *Theory Probab. Appl.* **54**, 638–58.
- VON NEUMANN, J. & GOLDSTINE, H. H. (1947). Numerical inverting of matrices of high order. *Bull. Am. Math. Soc.* **53**, 1021–99.

[Received August 2016. Revised XXXX 201X]

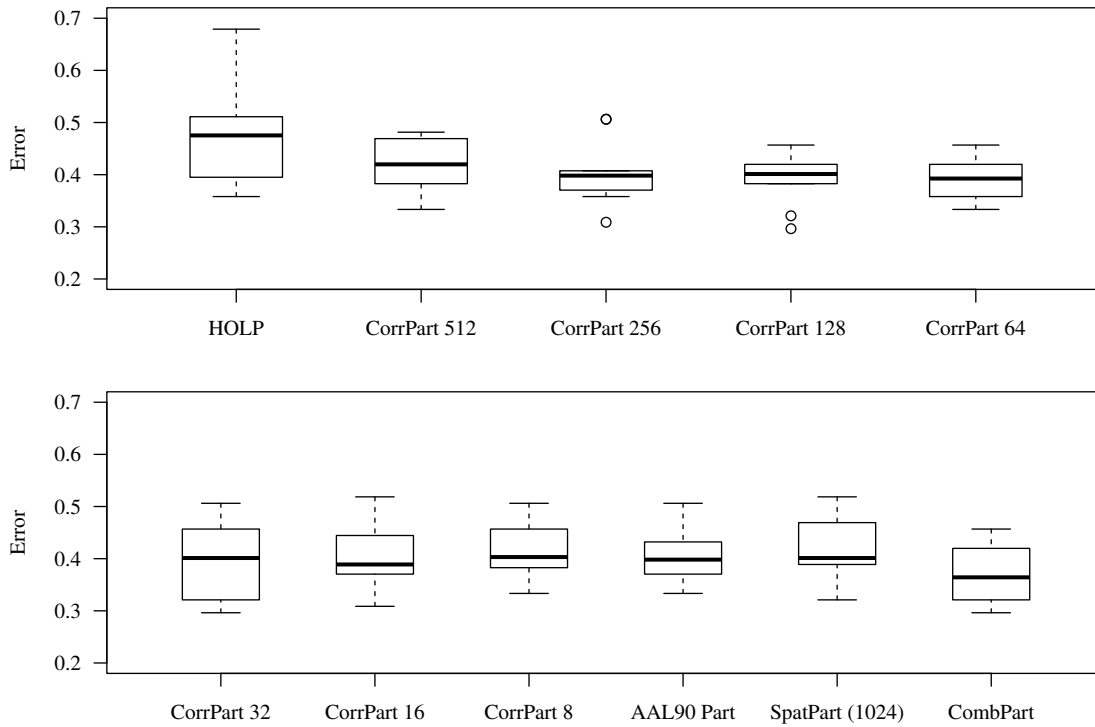

Fig. S1. Boxplots for the autism spectrum disorder risk prediction errors of ten-fold cross-validation by different variable screening methods. The mean cross-validation prediction errors: high-dimensional ordinary least squares projection (HOLP, 48%), correlation-guided partition screening (CorrPartS  $G = 8, \dots, 512$ , 39%–42%), brain region partition-based screening (AAL90, 41%), spatial-oriented partition screening (SpatPartS, 42%) and combined partition-based screening (CombPartS, 37%).

Table S2. *Model selection accuracy of partition-based screening with and without the goodness-of-fit adjustment for both linear regression and logistic regression under Settings 1–4*

| Setting 1                                                                                        | Linear Regression   |      |         |                |      |         |  |
|--------------------------------------------------------------------------------------------------|---------------------|------|---------|----------------|------|---------|--|
|                                                                                                  | No adjustment       |      |         | GOF adjustment |      |         |  |
|                                                                                                  | PIT (%)             | MMS  | TPR (%) | PIT (%)        | MMS  | TPR (%) |  |
| PartS ( $\mathcal{G}^{\text{red}}$ )                                                             | 100                 | 7    | 100     | 100            | 6    | 100     |  |
| PartS ( $\mathcal{G}^{\text{mis}_1}$ )                                                           | 84                  | 36   | 97      | 91             | 30   | 100     |  |
| PartS ( $\mathcal{G}^{\text{mis}_2}$ )                                                           | 87                  | 34   | 98      | 82             | 47   | 100     |  |
| CombPartS (5 $\mathcal{G}^{\text{mis}_2}$ )                                                      | 93                  | 25   | 99      | 92             | 32   | 100     |  |
| CombPartS (10 $\mathcal{G}^{\text{mis}_2}$ )                                                     | 96                  | 22   | 99      | 89             | 46   | 100     |  |
| CorrPartS ( $\mathcal{G}^{\text{cor}}$ )                                                         | 78                  | 64   | 96      | 81             | 56   | 100     |  |
| Setting 2                                                                                        | Logistic Regression |      |         |                |      |         |  |
|                                                                                                  | No adjustment       |      |         | GOF adjustment |      |         |  |
|                                                                                                  | PIT (%)             | MMS  | TPR (%) | PIT (%)        | MMS  | TPR (%) |  |
| PartS ( $\mathcal{G}^{\text{red}}$ )                                                             | 100                 | 6    | 100     | 97             | 6    | 100     |  |
| PartS ( $\mathcal{G}^{\text{mis}_1}$ )                                                           | 46                  | 226  | 88      | 53             | 175  | 100     |  |
| PartS ( $\mathcal{G}^{\text{mis}_2}$ )                                                           | 60                  | 145  | 91      | 33             | 361  | 83      |  |
| CombPartS (5 $\mathcal{G}^{\text{mis}_2}$ )                                                      | 64                  | 115  | 93      | 56             | 159  | 100     |  |
| CombPartS (10 $\mathcal{G}^{\text{mis}_2}$ )                                                     | 74                  | 105  | 96      | 52             | 192  | 100     |  |
| CorrPartS ( $\mathcal{G}^{\text{cor}}$ )                                                         | 47                  | 219  | 88      | 30             | 369  | 83      |  |
| Setting 3                                                                                        | Linear Regression   |      |         |                |      |         |  |
|                                                                                                  | No adjustment       |      |         | GOF adjustment |      |         |  |
|                                                                                                  | PIT (%)             | MMS  | TPR (%) | PIT (%)        | MMS  | TPR (%) |  |
| PartS ( $\mathcal{G}^{\text{red}}$ )                                                             | 100                 | 10   | 100     | 100            | 10   | 100     |  |
| CorrPartS ( $\mathcal{G}^{\text{cor}}$ )                                                         | 91                  | 10   | 98      | 96             | 10   | 100     |  |
| Setting 4                                                                                        | Logistic Regression |      |         |                |      |         |  |
|                                                                                                  | No adjustment       |      |         | GOF adjustment |      |         |  |
|                                                                                                  | PIT (%)             | MMS  | TPR (%) | PIT (%)        | MMS  | TPR (%) |  |
| PartS ( $\mathcal{G}^{\text{red}}$ )                                                             | 100                 | 10   | 100     | 100            | 10   | 100     |  |
| CorrPartS ( $\mathcal{G}^{\text{cor}}$ )                                                         | 88                  | 10   | 98      | 90             | 10   | 100     |  |
| Setting 4                                                                                        | Linear Regression   |      |         |                |      |         |  |
|                                                                                                  | No adjustment       |      |         | GOF adjustment |      |         |  |
|                                                                                                  | PIT (%)             | MMS  | TPR (%) | PIT (%)        | MMS  | TPR (%) |  |
| PartS ( $\mathcal{G}^{\text{red}}$ )                                                             | 100                 | 11   | 100     | 100            | 10   | 100     |  |
| CorrPartS ( $\mathcal{G}^{\text{cor}}$ )                                                         | 62                  | 101  | 100     | 36             | 574  | 90      |  |
| Setting 4                                                                                        | Logistic Regression |      |         |                |      |         |  |
|                                                                                                  | No adjustment       |      |         | GOF adjustment |      |         |  |
|                                                                                                  | PIT (%)             | MMS  | TPR (%) | PIT (%)        | MMS  | TPR (%) |  |
| PartS ( $\mathcal{G}^{\text{red}}$ )                                                             | 100                 | 10   | 100     | 100            | 10   | 100     |  |
| CorrPartS ( $\mathcal{G}^{\text{cor}}$ )                                                         | 18                  | 426  | 80      | 10             | 1579 | 0       |  |
| Setting 4                                                                                        | Linear Regression   |      |         |                |      |         |  |
|                                                                                                  | No adjustment       |      |         | GOF adjustment |      |         |  |
|                                                                                                  | PIT (%)             | MMS  | TPR (%) | PIT (%)        | MMS  | TPR (%) |  |
| SpatPartS ( $\mathcal{G}^{\text{opt}}$ )                                                         | 100                 | 100  | 100     | 100            | 101  | 100     |  |
| SpatPartS ( $\mathcal{G}^{\text{red}}$ )                                                         | 100                 | 100  | 100     | 100            | 101  | 100     |  |
| SpatPartS ( $\mathcal{G}^{\text{mis}_1}$ )                                                       | 0                   | 8232 | 65      | 0              | 7975 | 64      |  |
| SpatPartS ( $\mathcal{G}^{\text{mis}_2}$ )                                                       | 0                   | 9190 | 55      | 0              | 8672 | 71      |  |
| CombPartS ( $\mathcal{G}^{\text{red}}, \mathcal{G}^{\text{mis}_1}, \mathcal{G}^{\text{mis}_2}$ ) | 100                 | 100  | 100     | 100            | 102  | 100     |  |
| Setting 4                                                                                        | Logistic Regression |      |         |                |      |         |  |
|                                                                                                  | No adjustment       |      |         | GOF adjustment |      |         |  |
|                                                                                                  | PIT (%)             | MMS  | TPR (%) | PIT (%)        | MMS  | TPR (%) |  |
| SpatPartS ( $\mathcal{G}^{\text{opt}}$ )                                                         | 100                 | 100  | 100     | 36             | 733  | 99      |  |
| SpatPartS ( $\mathcal{G}^{\text{red}}$ )                                                         | 73                  | 174  | 100     | 3              | 5617 | 96      |  |
| SpatPartS ( $\mathcal{G}^{\text{mis}_1}$ )                                                       | 0                   | 9033 | 65      | 0              | 9615 | 25      |  |
| SpatPartS ( $\mathcal{G}^{\text{mis}_2}$ )                                                       | 0                   | 9269 | 74      | 0              | 9100 | 59      |  |
| CombPartS ( $\mathcal{G}^{\text{red}}, \mathcal{G}^{\text{mis}_1}, \mathcal{G}^{\text{mis}_2}$ ) | 80                  | 174  | 100     | 12             | 1561 | 98      |  |

PartS, partition-based screening; CombPartS, combined partition-based screening; CorrPartS, correlation-guided partition screening; SpatPartS, spatial-oriented partition screening; MMS, the median minimum size of the selected models that are required to have a sure screening; TPR, the average true positive rate; PIT, the estimated probability of including all true predictors in the top  $n$  selected predictors; GOF, goodness-of-fit.

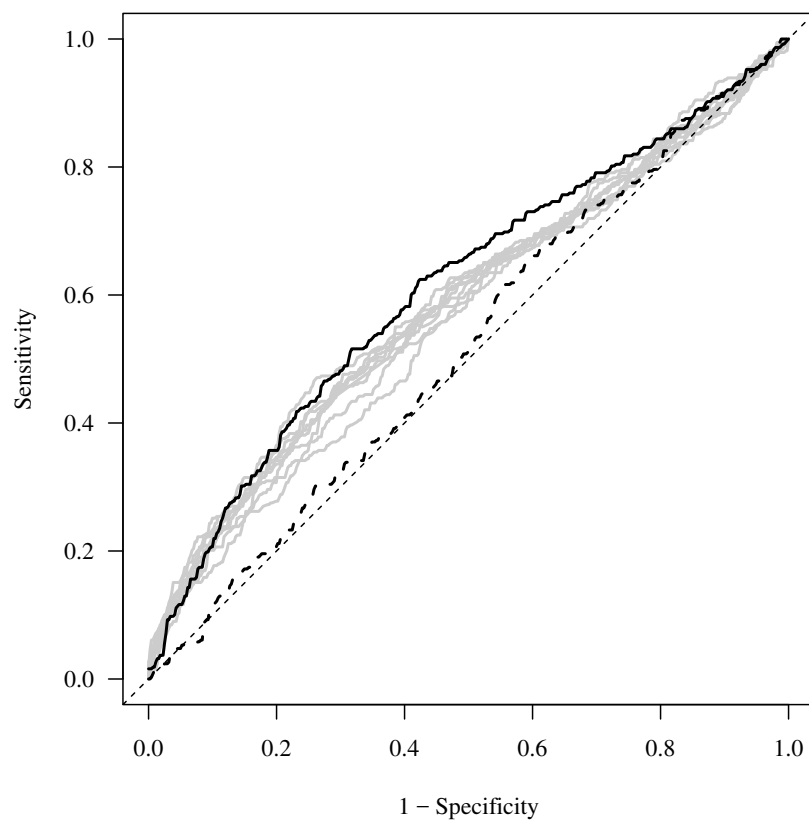

Fig. S2. Prediction receiver operating characteristic curves by combined partition-based screening (solid line), other partition-based screening (grey curves) and high-dimensional ordinary least squares projection (dashes). The reported area under the curves indicates that the proposed method improves on the prediction accuracy compared with high-dimensional ordinary least squares projection.

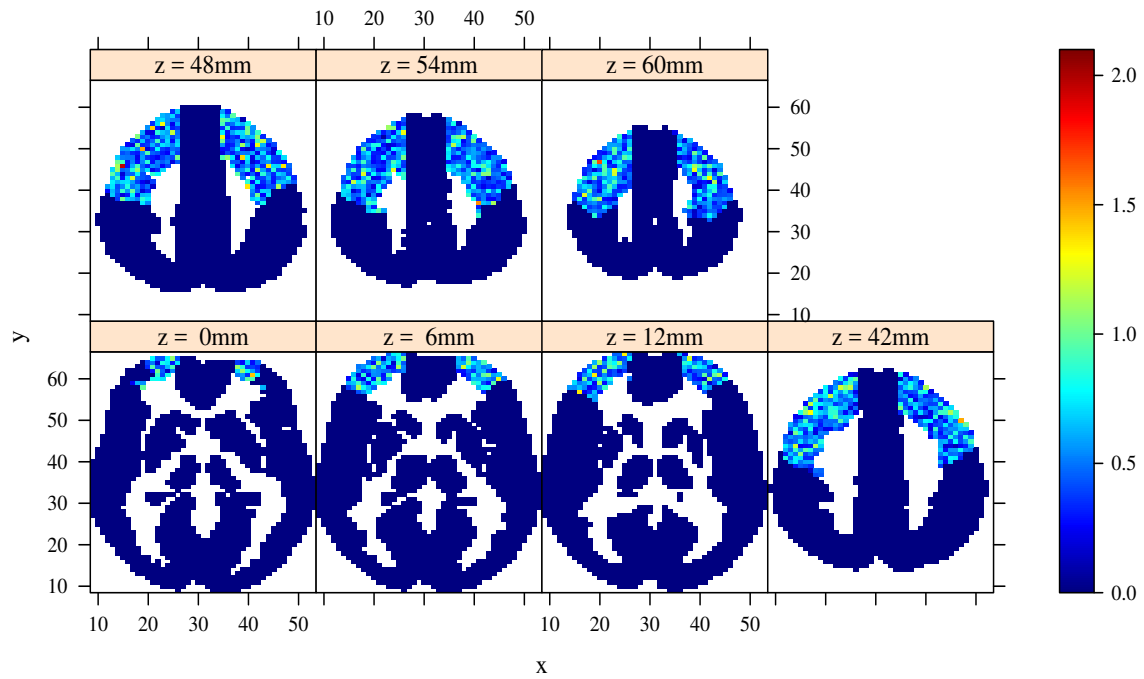

Fig. S3. Combined partition-based screening statistics are shown on seven axial slices that cut through eight important brain regions, which have more than 60 selected voxels.
